# Supplementary material for: PPR596 Is Required for nad2 Intron Splicing and Complex I Biogenesis in Arabidopsis
Source: Int J Mol Sci. 2024 Mar 21;25(6):3542. doi: 10.3390/ijms25063542 (PMC10971677; doi:10.3390/ijms25063542)
Supplement: Supplementary file 1 [file ijms-25-03542-s001.zip › Table S1.xlsx]

## Sheet: Sheet1
Table S1. List of the PCR primers used in the study.
Primer Name	Sequence 5'-3'	Use of the Primer
SAIL_367_A06-F	ATGCCTCTCTTGGGAGAGAAG	Genotyping
SAIL_367_A06-R	ATCTGCCACATGAGGAGTGTC	Genotyping
RT-PPR596-F	GGAAGATCTGTGAATCAAAGC	PPR596 expression
RT-PPR596-R	CTAAGCCGAGATGTATACCC	PPR596 expression
qAtnad2-e1-2-F	GGATCCTCCCACACATGTTC	qRT-PCR
qAtnad2-i1-F	CCCATTCCTAACCAGTGGAG	qRT-PCR
qAtnad2-e1-2-R	GCGAGCAGAAGCAAGGTTAT	qRT-PCR
qAtnad2-e2-3-F	AATATTTGATCTTAGGTGCATTTTC	qRT-PCR
qAtnad2-i2-R	CCCGATCCGATAGTTTACAA	qRT-PCR
qAtnad2-e2-3-R	AAAGGAACTGCAGTGATCTTGA	qRT-PCR
qAtnad2-e3-4-F	CTATGGGTCTACTGGAGCTACCC	qRT-PCR
qAtnad2-i3-F	GGCGAATTTCAAACTTGTGG	qRT-PCR
qAtnad2-e3-4-R	GCGCAATAGAAAGGAATGCT	qRT-PCR
qAtnad2-e4-5-F	TATTTGTTCTTCGCCGCTTT	qRT-PCR
qAtnad2-i4-R	CTTATTCGTGGCAACCTTCC	qRT-PCR
qAtnad2-e4-5-R	CAAAGGAGAGGGGTATAGCAA	qRT-PCR
qAtnad4-e1-2-F	ATTCTATGTTTTTCCCGAAAGC	qRT-PCR
qAtnad4-i1-F	CCGTATGATGCGGAAGTCTC	qRT-PCR
qAtnad4-e1-2-R	GAAAAACTGATATGCTGCCTTG	qRT-PCR
qAtnad4-e2-3-F	AATACCCATGTTTCCCGAAG	qRT-PCR
qAtnad4-i2-F	GCGGAACGACCAGAAAAATA	qRT-PCR
qAtnad4-e2-3-R	TGCTACCTCCAATTCCCTGT	qRT-PCR
qAtnad4-e3-4-F	TTCCTCCATAAATTCTCCGATT	qRT-PCR
qAtnad4-i3-F	TCTAGCTTGGTTCGGAGAGC	qRT-PCR
qAtnad4-e3-4-R	TGAAATTTGCCATGTTGCAC	qRT-PCR
qAtnad5-e1-2-F	CCATGGATCTCATCGGAAAT	qRT-PCR
qAtnad5-i1-F	TTCGCAAATAGGTCCGACT	qRT-PCR
qAtnad5-e1-2-R	TGGACCAAGCTACTTATGGATG	qRT-PCR
qAtnad5-e2-3-F	CTGGCTCTCGGGAGTCTCTT	qRT-PCR
qAtnad5-i2-F	GTACGATCGTGTCGGGTGA	qRT-PCR
qAtnad5-e2-3-R	TACCTAAACCAATCATCATATC	qRT-PCR
qAtnad5-e3-4-F	GATATGATGATTGGTTTAGGTA	qRT-PCR
qAtnad5-i3-F	GCCGTGTAATAGGCGACCA	qRT-PCR
qAtnad5-e3-4-R	AACTCGGATTCGGCAAGAA	qRT-PCR
qAtnad5-e4-5-F	GTTCCTGCGTTTCGGATAT	qRT-PCR
qAtnad5-i4-F	CCTGTAAACCCCCATGATGT	qRT-PCR
qAtnad5-e4-5-R	AACATTGCAAAGGCATAATGA	qRT-PCR
q-aox1a-F	AGCATCATGTTCCAACGACGTTTC	qRT-PCR
q-aox1a-R	GCTCGACATCCATATCTCCTCTGG	qRT-PCR
q-aox1b-F	GGACCGTGAAATCTCTTCGATGGC	qRT-PCR
q-aox1b-R	TCTAGCATCATTGCTCTGCATCCG	qRT-PCR
q-aox1c-F	TCTTCCAGAGGAGGTATGGTTGCC	qRT-PCR
q-aox1c-R	AGTGCATAAGCATCCCTCCAACC	qRT-PCR
q-aox1d-F	TTTGCTCGAAGAGGCTGAGAACG	qRT-PCR
q-aox1d-R	CTCGTTCGTACCATTTGGGTTGTG	qRT-PCR
q-aox2-F	ACGGTGATTCGTGCTGATGAAGC	qRT-PCR
q-aox2-R	TCCTTGATTGCGAATGTCAGAAGC	qRT-PCR
q-nda1-F	GTATCCAACCGGCGATTTCACG	qRT-PCR
q-nda1-R	AGTTACAGTCTCACAATGCACCTC	qRT-PCR
q-nda2-F	TGGTGTTGGTCCTTCTCCTTTCG	qRT-PCR
q-nda2-R	TCCATTCGTCAATGCCAATCCTTC	qRT-PCR
q-ndb1-F	TAACACATTTGGCACTCCTGGTG	qRT-PCR
q-ndb1-R	CTCTGTGCATCCTCTACTTCCTTG	qRT-PCR
qActin2-F	GCCATCCAAGCTGTTCTCTC	qRT-PCR
qActin2-R	GCTCGTAGTCAACAGCAACAA	qRT-PCR
NAD2 Intron1 F	TGCAACCTTTATTTTGCTCATTCA	RT-PCR (intron splicing)
NAD2 Intron1 R	AAACCGGCTTCCGTGGAAA	RT-PCR (intron splicing)
NAD2 Intron2 F	TGGCGCACCTCTCCTAACTA	RT-PCR (intron splicing)
NAD2 Intron2 R	GCACCAGTGATTTCGTATCCG	RT-PCR (intron splicing)
NAD2 Intron3 F	GGGTCTACTGGAGCTACCCA	RT-PCR (intron splicing)
NAD2 Intron3 R	CCAAAGCGGCGAAGAACAAA	RT-PCR (intron splicing)
NAD2 Intron4 F	CCCCGGTTACAGCATTCCTT	RT-PCR (intron splicing)
NAD2 Intron4 R	CTGAGAACAAAGGAGAGGGGT	RT-PCR (intron splicing)
nad2 E-1-F	CGGATCCTCCCACACATGTT	RT-PCR (accumulation of unspliced introns)
nad2 i-1-R	AGGAATTGTGCTATGCCCCC	RT-PCR (accumulation of unspliced introns)
nad2-I-1-F	CCCCGGCGCATATTAGCTTA	RT-PCR (accumulation of unspliced introns)
nad2-E2-R	CCGGCTTCCGTGGAAAATTC	RT-PCR (accumulation of unspliced introns)
nad2 E-2-F	TGGCGCACCTCTCCTAACTA	RT-PCR (accumulation of unspliced introns)
nad2-i-2-R	CCCCCGTAAGATCAATATCACA	RT-PCR (accumulation of unspliced introns)
nad2-E3-F	GGGTCTACTGGAGCTACCCA	RT-PCR (accumulation of unspliced introns)
nad2-i3-R	GAAAGGAGAGGGACAAGGGC	RT-PCR (accumulation of unspliced introns)
nad2-E4-F	CCCCGGTTACAGCATTCCTT	RT-PCR (accumulation of unspliced introns)
nad2-i4-R	GAGAACTGCCTTCGGTCCTC	RT-PCR (accumulation of unspliced introns)
RT-NAD5-F	TGGCCGCTCTGTAATTGTCT	RT-PCR
RT-NAD5-R	GCAAGCTCCTCCAGTTCGAT	RT-PCR
RT-NAD9-F	CCCAAAGACTCCCATGCCTT	RT-PCR
RT-NAD9-R	ATTTGTCCCCTGGACTGGTG	RT-PCR
RT-RPL16-F	TCGATTATGCTCCTGCGGAA	RT-PCR
RT-RPL16-R	CGAACATGGTTTATGAGCCGC	RT-PCR
RT-rpS3-F	TGGCACGAAAAGGAAATCCG	RT-PCR
RT-rpS3-R	TCGGATATAGCACGTCTCCC	RT-PCR
RT-ccmB-F	GATGATGTTACGCGGCGTTC	RT-PCR
RT-ccmB-R	CATACCCGGCCCAACATTCT	RT-PCR
RT-cox2-F	AAATGAAGGAACCTTTGCTTTGA	RT-PCR
RT-cox2-R	TTAAGCTTCCCCGGTTTGG	RT-PCR
RT-ccmFc -F	AGAAGCCAAACTCGAACGGA	RT-PCR
RT-ccmFc -R	CCGCAGCCACTACTTTGACT	RT-PCR
RT-rpL5-F	AGGAGTAGGAGGAGTCAGCTT	RT-PCR
RT-rpL5-R	CCGCTCCACAGTGGTAAAGT	RT-PCR
RT-cob-F	AGGAACCAACGATTCTCTCTTCT	RT-PCR
RT-cob-R	TGATTGGTGTCAGAATTTTTCACTG	RT-PCR
RT-nad6-F	TTCAGGGAAGGACGACGGTA	RT-PCR
RT-nad6-R	GATCGTGAGTGGGTCAGTCG	RT-PCR
RT-nad2-F	TGCTCCATACGGGGGAAATG	RT-PCR
RT-nad2-R	ACCCTTTCTTTGAACCTTGTCA	RT-PCR
RT-rps4-F	TCAACGAGATATAGATTTGTCCCCA	RT-PCR
RT-rps4-R	CCCTATGAGTGACTACGCCG	RT-PCR
RT-atp6-1-F	AAGCTGTCTGGAGGGAATCA	RT-PCR
RT-atp6-1-R	AGCTACACCTAATTCCAGACCG	RT-PCR
RT-atp8-F	TGTCTGGAGGGAATCATTTTGT	RT-PCR
RT-atp8-R	GCACAGTCGAGTGCTTTACC	RT-PCR
RT-nad7-F	TGCCTTTCTTTCCCATGACGA	RT-PCR
RT-nad7-R	CTTCTGGGCTCGCAATAAAGC	RT-PCR
RT-matR-F	CGATCCCGAGTTTCCAGACA	RT-PCR
RT-matR-R	GGGTCCGAGCTTCCCAAG	RT-PCR
RT-rpl2-F	AGGAGGAGTCAGACGGAATCA	RT-PCR
RT-rpl2-R	GATGGTCATTCTGGGCGGAT	RT-PCR
RT-orfX-F	CGCATCGGAAACGATTCTAGG	RT-PCR
RT-orfX-R	TGATAGTTACTTTGCCAGGTTCT	RT-PCR
RT-nad4-F	TCTCTTCAATGTTCGATTCTACTCT	RT-PCR
RT-nad4-R	ACCCGTTTTTCTTTTCTTTGCTGA	RT-PCR
RT-atp4-F	TGAGTTCGACGAATATGGATGCT	RT-PCR
RT-atp4-R	CCGCTCTTCTGAGAGCATGA	RT-PCR
RT-nad4L-F	TCCACGTTCCCGAAATGGAT	RT-PCR
RT-nad4L-R	GCAATAGTACCTCGGACTCGG	RT-PCR
RT-cox3-F	GGTGAAGGGTGGGGGTTTAC	RT-PCR
RT-cox3-R	AGCCCGGTTCTCTTTGTCTT	RT-PCR
RT-ccmFn1-F	ACCGGATGATGGGAATAACGA	RT-PCR
RT-ccmFn1-R	CGAGTCATTAGGGTTCCTCTCC	RT-PCR
RT-ccmC-F	CCATGTCTTTCTTGTTCCACTAGC	RT-PCR
RT-ccmC-R	AGGTTGGGCGCTTTAACCAT	RT-PCR
RT-ccmFn2-F	CCTACGACGGTAAATCGGGG	RT-PCR
RT-ccmFn2-R	AACCAGCCCAGCAAGAAGTT	RT-PCR
RT-rpsl2-F	GTAGAGAAGAAAAACGGCGCA	RT-PCR
RT-rps12-R	AGAGGCATCTTCCATTCATATCG	RT-PCR
RT-nad3-F	CCAGCAAGGAGCGAGAAAAC	RT-PCR
RT-nad3-R	ATCCGAAGCACCCCTTTTCC	RT-PCR
RT-atp9-F	AGTGAATGACAAAGCGTGAGT	RT-PCR
RT-atp9-R	TGGAAACCTTCTTTCTTCGATCA	RT-PCR
RT-nad1-F	TCATGATTGGGTCGACCAGG	RT-PCR
RT-nad1-R	TCCAAGAGGGCAATTCCTCG	RT-PCR
RT-atp6-2-F	AGCTCTCGCAGAAGAATTGGT	RT-PCR
RT-atp6-2-R	AGCATAGTCCAAGCGAACCC	RT-PCR
RT-atp1-F	AAGCGGTATTCCTCCTTGCC	RT-PCR
RT-atp1-R	TGAGGATTCCTAATGTGATGAAAGC	RT-PCR
RT-rpS7-F	AAAGCGGCTTCCAATTGCTC	RT-PCR
RT-rpS7-R	TGTGGTCTCACTTTACCACCA	RT-PCR
RT-cox1-F	CCTAACCCCTCTCTGATAAGGT	RT-PCR
RT-cox1-R	CAGTCGGCGACCTTTTCTTC	RT-PCR
RT-Actin2-F	GCCATCCAAGCTGTTCTCTC	RT-PCR
RT-Actin2-R	GCTCGTAGTCAACAGCAACAA	RT-PCR
LIGPPR596F	CACCATGTTCGCTCTTTCCAAGGT	ligation into pENTR vector
LIGPPR596R	ATCCAGAATATCAGAGATAGCTGT	ligation into pENTR vector
